# Supplementary material
Source: PubMed Central journal article supplement (PMC6245202)
Supplement: DC181662SupplementaryData1.pdf [file DC181662SupplementaryData1.pdf]

SUPPLEMENTARY DATA

**Supplementary Figure 1.** Overview of Study Design. Procedures are described in text.

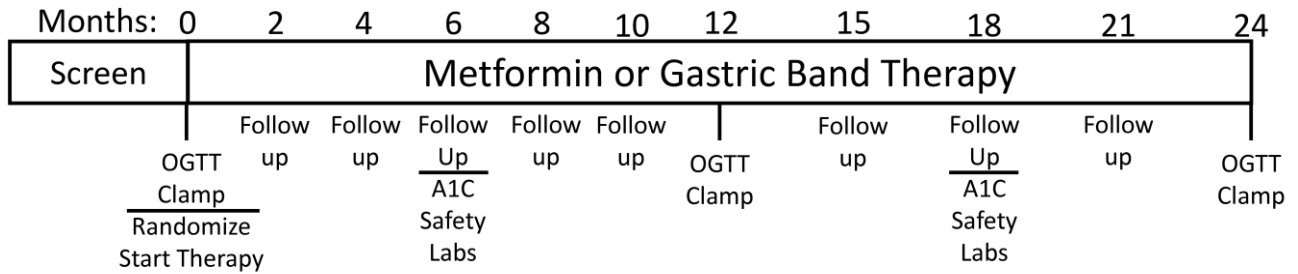

**Supplementary Figure 2.** Consort diagram of enrollment and progress through the study.

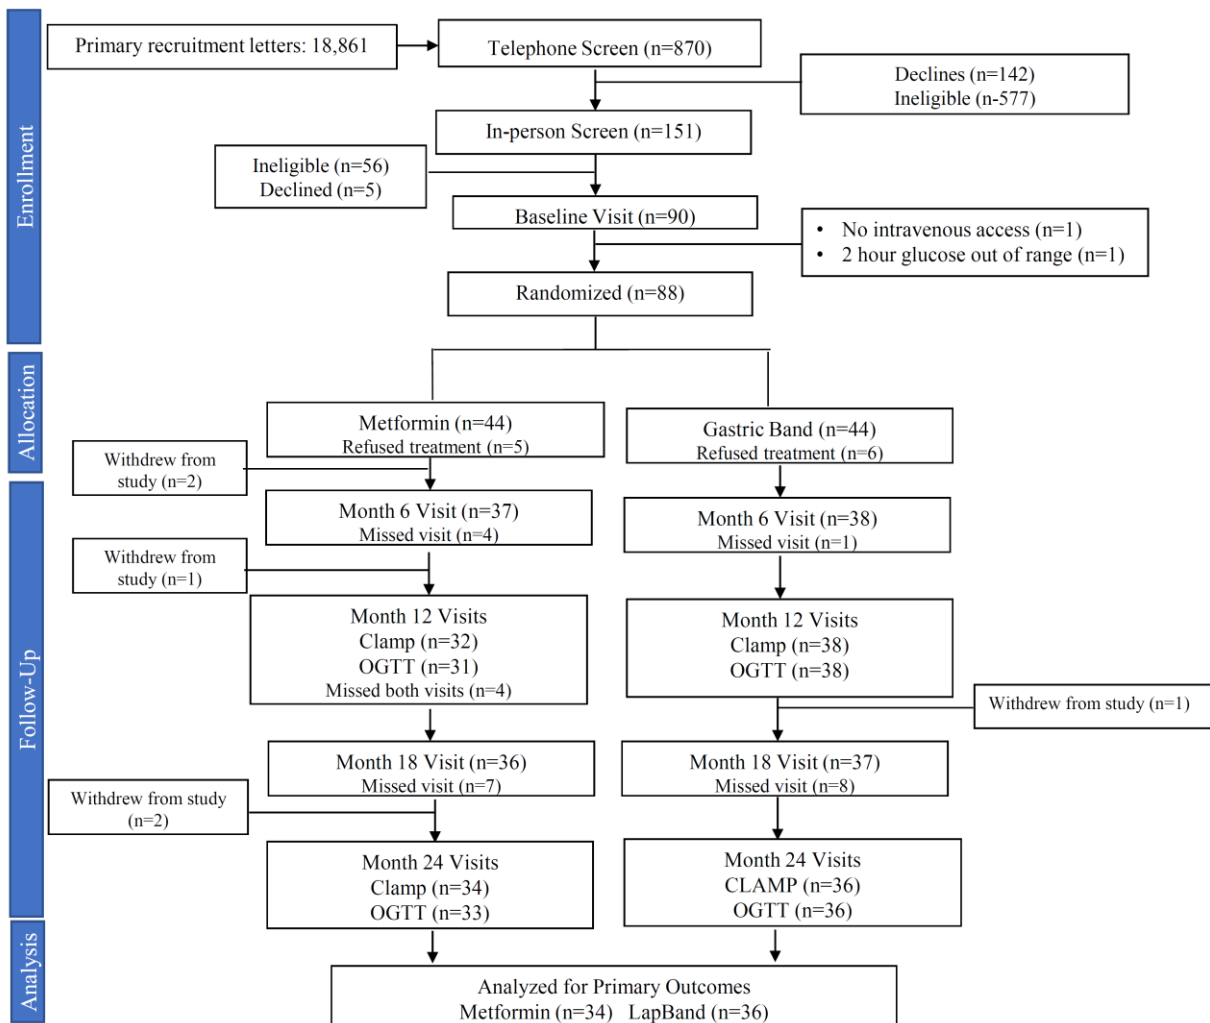

## SUPPLEMENTARY DATA

**Supplementary Figure 3.** Plasma glucose levels during glucose clamp studies at baseline, 12 and 24 months. Glucose was injected at t=0 minutes to raise plasma glucose to ~11.1 mmol/L. An infusion of glucose was used to clamp plasma glucose at ~11.1 mmol/L until 120 minutes, then raise plasma glucose to >25 mmol/L over at least 30 min, when arginine (5 grams) was injected. Primary outcomes were assessed during steady state (100-120 minutes) and maximal response (five minutes after arginine injection) periods. Data are mean  $\pm$  se.

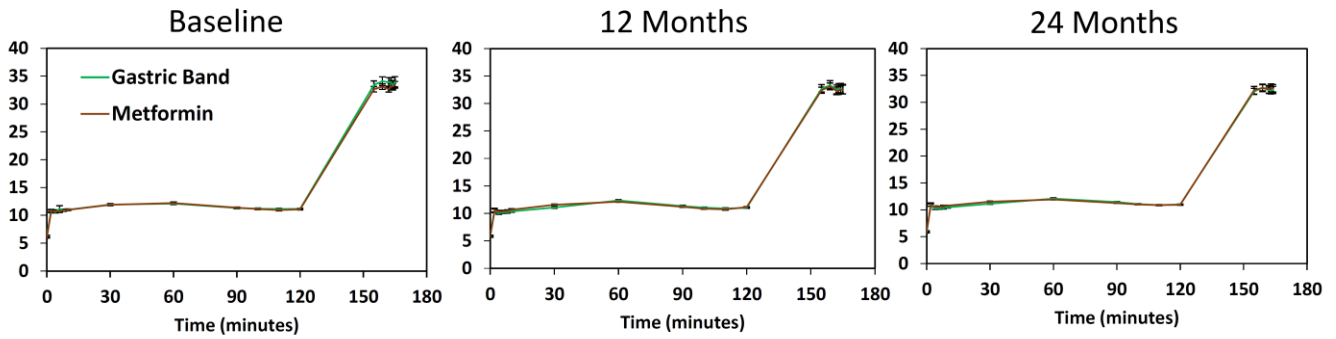

SUPPLEMENTARY DATA

**Supplementary Table 1.** Impact of treatments on secondary clamp outcomes\*

| Clamp Secondary Outcomes                                                                       | Gastric Band (n=36) |                   |           | Metformin (n=34)  |                   |           | Intergroup P-value † |          |
|------------------------------------------------------------------------------------------------|---------------------|-------------------|-----------|-------------------|-------------------|-----------|----------------------|----------|
|                                                                                                | Baseline            | 24 Months         | P-value ‡ | Baseline          | 24 Months         | P-value ‡ | Baseline             | 24-Month |
| Acute <sup>‡</sup> C-peptide response to glucose (ACPRg; nmol/L) adjusted for M/I <sup>§</sup> | 0.43 (0.31, 0.59)   | 0.59 (0.44, 0.78) | 0.014     | 0.48 (0.34, 0.66) | 0.48 (0.35, 0.65) | 0.33      | 0.65                 | 0.17     |
| Acute <sup>‡</sup> insulin response to glucose (AIRg; pmol/L) adjusted for M/I <sup>§</sup>    | 167 (121, 221)      | 213 (164, 270)    | 0.015     | 178 (129, 236)    | 187 (141, 242)    | 0.12      | 0.77                 | 0.45     |
| Maximum <sup>¶</sup> insulin response (AIRmax; pmol/L) adjusted for M/I <sup>§</sup>           | 3029 (2485, 3692)   | 2569 (2154, 3063) | 0.30      | 2916 (2379, 3575) | 2468 (2059, 2958) | 0.045     | 0.79                 | 0.69     |
| Steady-state <sup>#</sup> insulin (pmol/L)                                                     | 591 (454, 770)      | 404 (313, 520)    | <0.0001   | 492 (375, 645)    | 432 (333, 561)    | 0.022     | 0.34                 | 0.02     |
| Steady-state <sup>#</sup> glucose infusion rate (mmol/kg/min)                                  | 0.19 (0.16, 0.23)   | 0.19 (0.16, 0.22) | 0.90      | 0.16 (0.13, 0.20) | 0.18 (0.15, 0.21) | 0.39      | 0.29                 | 0.96     |
| <b>Clinical Glucose Status**</b>                                                               |                     |                   | 0.018     |                   |                   | 0.033     | 0.46                 | 0.63     |
| Normal (n, %)                                                                                  | 0 (0%)              | 8 (22%)           |           | 0 (0%)            | 5 (15%)           |           |                      |          |
| IGT (n, %)                                                                                     | 18 (50%)            | 16 (45%)          |           | 20 (59%)          | 15 (44%)          |           |                      |          |
| Diabetes (n, %)                                                                                | 18 (50%)            | 12 (33%)          |           | 14 (41%)          | 14 (41%)          |           |                      |          |

Abbreviations: IGT=impaired glucose tolerance

\* Data presented are geometric means (95% CI) from 70 individuals who had data on primary outcomes at 24 months or n (%) for categorical variables

† P-value testing for difference between groups at baseline and 24-months after adjusting for baseline value of the variable

‡ P-value testing for change within group

§ M/I is defined as mean glucose infusion rate divided by mean insulin concentration at steady state (100, 110, 120 min) during glucose clamp

‖ Mean incremental plasma concentration curve for first 10 min above concentrations before glucose injection to initiate glucose clamp

¶ AIRmax is acute insulin release, maximal, defined as mean incremental insulin response above concentrations before arginine injection

# Mean of measurements made at 100, 110, 120 min during glucose clamp at ~200 mg/dl

\*\* By American Diabetes Association Criteria

SUPPLEMENTARY DATA

**Supplementary Table 2.** Impact of treatments on cardiovascular and hepatic outcomes\*

|                                | Gastric Band (n=36) |                   |                      | Metformin (n=34)  |                   |                      | Intergroup P-value <sup>†</sup> |          |
|--------------------------------|---------------------|-------------------|----------------------|-------------------|-------------------|----------------------|---------------------------------|----------|
|                                | Baseline            | 24 Months         | P-value <sup>‡</sup> | Baseline          | 24 Months         | P-value <sup>‡</sup> | Baseline                        | 24-Month |
| Systolic BP (mmHg)             | 127.1 ± 10.5        | 124.8 ± 11.3      | 0.19                 | 126.4 ± 10        | 128.9 ± 11.6      | 0.26                 | 0.79                            | 0.08     |
| Diastolic BP (mmHg)            | 78.3 ± 7.5          | 76.4 ± 7.6        | 0.11                 | 75.9 ± 8.1        | 77.6 ± 8.0        | 0.26                 | 0.23                            | 0.15     |
| Total cholesterol (mmol/L)     | 4.5 ± 0.7           | 4.4 ± 0.8         | 0.55                 | 4.5 ± 0.9         | 4.5 ± 1.1         | 0.84                 | 0.92                            | 0.57     |
| LDL cholesterol (mmol/L)       | 2.7 ± 0.7           | 2.5 ± 0.7         | 0.40                 | 2.7 ± 0.8         | 2.6 ± 0.9         | 0.49                 | 0.87                            | 0.80     |
| HDL cholesterol (mmol/L)       | 1.2 ± 0.3           | 1.3 ± 0.3         | 0.001                | 1.2 ± 0.3         | 1.3 ± 0.3         | 0.004                | 0.74                            | 0.30     |
| VLDL cholesterol (mmol/L)      | 0.60 (0.29, 1.24)   | 0.50 (0.24, 1.05) | 0.007                | 0.56 (0.24, 1.32) | 0.59 (0.27, 1.3)  | 0.44                 | 0.67                            | 0.009    |
| Total triglycerides (mmol/L)   | 1.32 (0.62, 2.68)   | 1.09 (0.52, 2.3)  | 0.007                | 1.23 (0.52, 2.89) | 1.28 (0.58, 2.82) | 0.43                 | 0.47                            | 0.009    |
| Alanine aminotransferase (U/L) | 26.1 ± 15.2         | 16.1 ± 6.3        | 0.001                | 26.7 ± 12.4       | 22.1 ± 9.1        | 0.04                 | 0.85                            | 0.001    |

Abbreviations: BP=blood pressure; LDL= low-density lipoprotein; HDL=high-density lipoprotein; VLDL=very low-density lipoprotein

\* Data presented are mean ± se for normally distributed variables, geometric means (95% CI) for skewed variables, from 70 individuals who had data on primary outcomes at 24 months.

<sup>†</sup> P-value testing for difference between groups at baseline and 24-month after adjusting for baseline value of the variable

<sup>‡</sup> P-value testing for change within group

SUPPLEMENTARY DATA

**Supplementary Table 3.** Number (%) of individuals with adverse events

|                                    | <b>All (n=88)</b> | <b>Gastric Band (n=44)</b> | <b>Metformin (n=44)</b> |
|------------------------------------|-------------------|----------------------------|-------------------------|
| Stomach Discomfort/Pain            | 11 (13%)          | ---                        | 11 (25%)                |
| Diarrhea                           | 3 (3%)            | ---                        | 3 (7%)                  |
| Breast Cancer*                     | 2 (2%)            | 2 (5%)                     | ---                     |
| Port Revision/Replacement          | 2 (2%)            | 2 (5%)                     | ---                     |
| Protracted Vomiting/Band Slippage* | 2 (2%)            | 2 (5%)                     | ---                     |
| Depression and GI issues           | 1 (1%)            | ---                        | 1 (2%)                  |
| Heartburn                          | 1 (1%)            | ---                        | 1 (2%)                  |
| Nausea                             | 1 (1%)            | ---                        | 1 (2%)                  |
| Lack of Energy                     | 1 (1%)            | ---                        | 1 (2%)                  |
| Upper GI for Dysphagia             | 1 (1%)            | 1 (2%)                     | ---                     |
| Laparoscopic Cholecystectomy*      | 1 (1%)            | 1 (2%)                     | ---                     |
| Motor Vehicle Accident*            | 1 (1%)            | ---                        | 1 (2%)                  |
| Elective Gastric Sleeve Surgery*   | 1 (1%)            | ---                        | 1 (2%)                  |

\* Serious Adverse Events

SUPPLEMENTARY DATA

**APPENDIX**

**RISE Consortium Investigators**  
**University of Chicago Clinical Research Center**  
**and Jesse Brown VA Medical Center**  
**(Chicago, IL)**

David A. Ehrmann, MD\*  
Karla A. Temple, PhD, RD\*\*  
Abby Rue\*\*  
Elena Barenholts, MD  
Babak Mokhlesi, MD, MSc  
Eve Van Cauter, PhD  
Susan Sam, MD, MSc  
M. Annette Miller, RN

**VA Puget Sound Health Care System and**  
**University of Washington**  
**(Seattle, WA)**

Steven E. Kahn, MB, ChB\*  
Karen M. Atkinson, RN\*\*  
Jerry P. Palmer, MD  
Kristina M. Utzschneider, MD  
Tsige Gebremedhin, BS  
Abigail Kernan-Schloss, BA  
Alexandra Kozeidub, MSN, ARNP  
Brenda K. Montgomery, RN, BSN, CDE  
Emily J. Morse, BS

**Indiana University School of Medicine and**  
**Richard L. Roudebush VA Medical Center**  
**(Indianapolis, IN)**

Kieren J. Mather, MD\*  
Tammy Garrett, RN\*\*  
Tamara S. Hannon, MD  
Amale Lteif, MD  
Aniket Patel MD  
Robin Chisholm, RN  
Karen Moore, RN  
Vivian Pirics, RN  
Linda Pratt, RN

**University of Colorado Denver/Children's**  
**Hospital Colorado**  
**(Denver, CO)**

Kristen J. Nadeau, MD, MS\*  
Susan Gross, RD\*\*  
Philip S. Zeitler, MD, PhD  
Jayne Williams, RN, MSN, CPNP  
Melanie Cree-Green MD, PhD  
Yesenia Garcia Reyes, MS  
Krista Vissat, RN, MSN, CPNP

\* denotes Principal Investigator  
\*\* denotes Program Coordinator

**Children's Hospital of Pittsburgh of UPMC**  
**(Pittsburgh, PA)**

Silva A. Arslanian, MD\*  
Kathleen Brown, RN, CDE\*\*  
Nancy Guerra, CRNP  
Kristin Porter, RN, CDE

**Yale University (New Haven, CT)**

Sonia Caprio, MD\*  
Mary Savoye, RD, CDE\*\*  
Bridget Pierpont, MS\*\*

**University of Southern California Keck School of**  
**Medicine/Kaiser Permanente Southern**  
**California**  
**(Los Angeles, CA)**

Thomas A. Buchanan, MD\*  
Anny H. Xiang, PhD\*  
Enrique Trigo, MD\*\*  
Elizabeth Beale, MD  
Fadi N. Hendee, MD  
Namir Katkhouda, MD  
Krishan Nayak, PhD  
Mayra Martinez, MPH  
Cortney Montgomery, BS  
Xinhui Wang, PhD

**George Washington University Biostatistics**  
**Center (RISE Coordinating Center; Rockville,**  
**MD)**

Sharon L. Edelstein, ScM\*  
John M. Lachin, ScD  
Ashley N. Hogan, MPH

**Northwest Lipid Research Laboratories**  
**(Central Biochemistry Laboratory; Seattle, WA)**

Santica Marcovina, PhD\*  
Jessica Harting\*\*  
John Albers, PhD

**Belmar Pharmacy**  
**(Drug Distribution Center; Lakewood, CO)**

Dave Hill

**NIH/NIDDK**  
**(Bethesda, MD)**

Peter J. Savage, MD  
Ellen W. Leschek, M

## SUPPLEMENTARY DATA

Steven E. Kahn, MB, ChB  
Silva A. Arslanian, MD  
Sharon L. Edelstein, ScM  
David A. Ehrmann, MD  
Kristen J. Nadeau, MD, MS  
Jerry P. Palmer, MD  
Kristina M. Utzschneider, MD

Karla A. Temple, PhD, RD  
Abby Rue  
Elena Barengolts, MD  
Babak Mokhlesi, MD, MSc  
Eve Van Cauter, PhD  
Susan Sam, MD, MSc  
M. Annette Miller, RN  
Karen M. Atkinson, RN  
Tsige Gebremedhin, BS  
Abigail Kernan-Schloss, BA  
Alexandra Kozeidub, MSN, ARNP  
Emily J. Morse, BS  
Kieren J. Mather, MD  
Tammy Garrett, RN  
Tamara S. Hannon, MD  
Amale Lteif, MD  
Aniket Patel MD  
Robin Chisholm, RN  
Karen Moore, RN  
Vivian Pirics, RN  
Linda Pratt, RN  
Susan Gross, RD  
Philip S. Zeitler, MD, PhD  
Jayne Williams, RN, MSN, CPNP  
Melanie-Cree Green, MD, PhD  
Yesenia Garcia Reyes, MS  
Krista Vissat, RN, MSN, CPNP  
Kathleen Brown, RN, CDE  
Nancy Guerra, CRNP  
Kristin Porter, RN, CDE  
Sonia Caprio, MD  
Mary Savoye, RD, CDE  
Bridget Pierpont, MS  
John M. Lachin, ScD  
Ashley N. Hogan, MPH  
Santica Marcovina, PhD  
Jessica Harting  
John Albers, PhD  
Dave Hill  
Peter J. Savage, MD  
Ellen W. Leschek, MD
